# Supplementary material for: Potentiating Effect of UVA Irradiation on Anticancer Activity of Carboplatin Derivatives Involving 7-Azaindoles
Source: PubMed Central journal article supplement (PMC4398499; doi:10.1371/journal.pone.0123595), 2015-04-15
Supplement: pone.0123595.s008.pdf [file pone.0123595.s008.pdf]

|          | <sup>1</sup> H NMR |      |      |      |      |      | <sup>13</sup> C NMR |     |     |     |     |     |      |
|----------|--------------------|------|------|------|------|------|---------------------|-----|-----|-----|-----|-----|------|
|          | N1H                | C2H  | C3H  | C4H  | C5H  | C6H  | C2                  | C3  | C3a | C4  | C5  | C6  | C7a  |
| <b>1</b> | 1.45               | 0.32 | –    | 0.20 | 0.16 | 0.72 | 2.7                 | 2.7 | 4.0 | 4.8 | 2.2 | 4.1 | –0.1 |
| <b>2</b> | 1.07               | 0.30 | –    | 0.19 | 0.14 | 0.73 | 2.6                 | 2.5 | 4.0 | 4.7 | 2.2 | 4.2 | 0.0  |
| <b>3</b> | 1.10               | 0.28 | –    | 0.17 | 0.14 | 0.73 | 2.5                 | 2.6 | 4.0 | 4.7 | 2.0 | 4.0 | 0.1  |
| <b>4</b> | 1.11               | 0.28 | 0.17 | –    | 0.21 | 0.74 | 2.5                 | 3.0 | 3.7 | 4.6 | 2.6 | 3.9 | –0.8 |
| <b>5</b> | 1.09               | 0.27 | 0.16 | –    | 0.19 | 0.73 | 2.6                 | 3.0 | 4.9 | 3.9 | 2.6 | 3.8 | –0.7 |
| <b>6</b> | 1.26               | 0.29 | 0.19 | 0.23 | –    | 1.09 | 2.4                 | 2.9 | 3.3 | 4.8 | 0.1 | 3.8 | 0.6  |
