# Supplementary material for: Potentiating Effect of UVA Irradiation on Anticancer Activity of Carboplatin Derivatives Involving 7-Azaindoles
Source: PubMed Central journal article supplement (PMC4398499; doi:10.1371/journal.pone.0123595), 2015-04-15
Supplement: pone.0123595.s009.pdf [file pone.0123595.s009.pdf]

[Pt(cbdc)(3Claza)<sub>2</sub>] (**1**): Grey powder; yield 38%. <sup>1</sup>H NMR (400.00 MHz, DMF-*d*<sub>7</sub>, ppm): δ = 13.15 (br s, N1-H), 9.07 (d, *J* = 4.8 Hz, C6-H), 8.17 (d, *J* = 7.6 Hz, C4-H), 8.05 (s, C2-H), 7.36 (t, *J* = 6.2 Hz, C5-H), 2.95 (t, *J* = 7.8 Hz, C11-H<sub>2</sub>, C12-H<sub>2</sub>), 1.78 (qui, *J* = 7.8 Hz, C13-H<sub>2</sub>). <sup>13</sup>C NMR (100.58 MHz, DMF-*d*<sub>7</sub>, ppm): δ = 178.7 (C8, C9), 148.4 (C6-H), 147.3 (C7a), 130.6 (C4-H), 126.1 (C2-H), 121.7 (C3a), 118.6 (C5-H), 105.3 (C3), 57.11 (C10), 31.9 (C11-H<sub>2</sub>, C12-H<sub>2</sub>), 16.02 (C13-H<sub>2</sub>). Elemental analysis calculated (%) for C<sub>20</sub>H<sub>16</sub>N<sub>4</sub>Cl<sub>2</sub>O<sub>4</sub>Pt: C 37.40, H 2.51, N 8.72. Found: C 37.52, H 2.55, N 8.42. FTIR (ν<sub>ATR</sub>/cm<sup>-1</sup>): 442w, 477w, 520w, 560w, 600m, 662m, 697w, 750s, 793m, 896w, 953w, 1017s, 1100m, 1206s, 1278s, 1338vs, 1364s, 1444m, 1492w, 1594vs, 1630vs, 2946s, 3099s. ESI+ MS (methanol, *m/z*): 664.0 (calc. 664.0; 20%) [{Pt(cbdc)(3Claza)<sub>2</sub>]+Na}<sup>+</sup>, 642.1 (calc. 642.0; 10%) [{Pt(cbdc)(3Claza)<sub>2</sub>]+H}<sup>+</sup>; 153.1 (calc. 153.0; 5%) [(3Claza)+H]<sup>+</sup>. ESI- MS (methanol, *m/z*): 676.0 (calc. 676.0; 5%) [{Pt(cbdc)(3Claza)+Cl}]<sup>-</sup>; 640.0 (calc. 640.0; 100%) [{Pt(cbdc)(3Claza)}-H]<sup>-</sup>; 488.1 (calc. 488.0; 10%) [{Pt(cbdc)(3Claza)}-H]<sup>-</sup>.

[Pt(cbdc)(3Braza)<sub>2</sub>] (**2**): Grey powder; yield 37%. <sup>1</sup>H NMR (400.00 MHz, DMF-*d*<sub>7</sub>, ppm): δ = 13.24 (br s, N1-H), 9.07 (d, *J* = 5.7 Hz, C6-H), 8.08 (s, C2-H), 8.07 (m, C4-H), 7.35 (t, *J* = 5.8 Hz, C5-H), 2.94 (t, *J* = 7.8 Hz, C11-H<sub>2</sub>, C12-H<sub>2</sub>), 1.78 (qui, *J* = 7.8 Hz, C13-H<sub>2</sub>). <sup>13</sup>C NMR (100.58 MHz, DMF-*d*<sub>7</sub>, ppm): δ = 178.6 (C8, C9), 148.4 (C6-H), 147.9 (C7a), 131.4 (C2-H), 128.6 (C4-H), 123.3 (C3a), 118.8 (C5-H), 90.2 (C3), 57.2 (C10), 32.0 (C11-H<sub>2</sub>, C12-H<sub>2</sub>), 16.1 (C13-H<sub>2</sub>). Elemental analysis calculated (%) for C<sub>20</sub>H<sub>16</sub>N<sub>4</sub>Br<sub>2</sub>O<sub>4</sub>Pt: C 32.85, H 2.21, N 7.66. Found: C 32.51, H 1.96, N 7.20. FTIR (ν<sub>ATR</sub>/cm<sup>-1</sup>): 476w, 509w, 552w, 596m, 647m, 678w, 749s, 791m, 896w, 952w, 994s, 1055w, 1100m, 1154w, 1203m, 1274vs, 1334vs, 1441m, 1491m, 1592vs, 1632vs, 2948s, 3109s. ESI+ MS (methanol, *m/z*): 753.9 (calc. 753.9; 10%) [{Pt(cbdc)(3Braza)<sub>2</sub>]+Na}<sup>+</sup>, 731.9 (calc. 731.9; 60%) [{Pt(cbdc)(3Braza)<sub>2</sub>]+H}<sup>+</sup>; 197.0 (calc. 197.0; 20%) [(3Braza)+H]<sup>+</sup>. ESI- MS (methanol, *m/z*): 765.8 (calc. 765.9; 10%)

[{Pt(cbdc)(3Braza)<sub>2</sub>}+Cl]<sup>-</sup>; 730.1 (calc. 729.9; 100%) [{Pt(cbdc)(3Braza)}-H]<sup>-</sup>; 532.1 (calc. 532.0; 15%) [{Pt(cbdc)(3Braza)}-H]<sup>-</sup>.

[Pt(cbdc)(3/aza)<sub>2</sub>] (**3**): Light grey powder; yield 42%. <sup>1</sup>H NMR (400.00 MHz, DMF-*d*<sub>7</sub>, ppm): δ = 13.28 (br s, N1-H), 9.04 (d, *J* = 5.7 Hz, C6-H), 8.09 (s, C2-H), 7.91 (d, *J* = 7.9 Hz, C4-H), 7.34 (dd, *J* = 7.9, 5.7 Hz, C5-H), 2.93 (t, *J* = 7.8 Hz, C11-H<sub>2</sub>, C12-H<sub>2</sub>), 1.78 (qui, *J* = 7.8 Hz, C13-H<sub>2</sub>). <sup>13</sup>C NMR (100.58 MHz, DMF-*d*<sub>7</sub>, ppm): δ = 178.6 (C8, C9), 148.6 (C7a), 148.2 (C6-H), 133.5 (C2-H), 133.0 (C4-H), 126.5 (C3a), 118.8 (C5-H), 90.2 (C3), 57.2 (C10), 32.0 (C11-H<sub>2</sub>, C12-H<sub>2</sub>), 16.1 (C13-H<sub>2</sub>). Elemental analysis calculated (%) for C<sub>20</sub>H<sub>16</sub>N<sub>4</sub>O<sub>4</sub>Pt: C 29.11, H 1.95, N 6.79. Found: C 29.04, H 2.07, N 7.17. FTIR (ν<sub>ATR</sub>/cm<sup>-1</sup>): 476w, 503w, 543w, 562w, 596w, 643w, 662w, 750m, 794m, 899w, 981m, 1057w, 1101m, 1155w, 1204m, 1272s, 1337vs, 1437m, 1490w, 1594vs, 1648vs, 2945m, 3124s. ESI+ MS (methanol, *m/z*): 847.8 (calc. 847.9; 60%) [{Pt(cbdc)(3/aza)<sub>2</sub>}+Na]<sup>+</sup>, 825.8 (calc. 825.9; 70%) [{Pt(cbdc)(3/aza)<sub>2</sub>}+H]<sup>+</sup>; 245.0 (calc. 245.0; 5%) [(3/aza)+H]<sup>+</sup>. ESI- MS (methanol, *m/z*): 859.7 (calc. 859.9; 5%) [{Pt(cbdc)(3/aza)}+Cl]<sup>-</sup>; 824.0 (calc. 823.9; 100%) [{Pt(cbdc)(3/aza)}-H]<sup>-</sup>; 580.0 (calc. 579.9; 10%) [{Pt(cbdc)(3/aza)}-H]<sup>-</sup>.

[Pt(cbdc)(4Claza)<sub>2</sub>] (**4**): Grey powder; yield 46%. <sup>1</sup>H NMR (400.00 MHz, DMF-*d*<sub>7</sub>, ppm): δ = 13.18 (br s, N1-H), 8.96 (d, *J* = 6.2 Hz, C6-H), 7.96 (t, *J* = 3.4 Hz, C2-H), 7.41 (d, *J* = 6.2 Hz, C5-H), 6.75 (d, *J* = 3.4 Hz, C3-H), 2.93 (m, C11-H<sub>2</sub>, C12-H<sub>2</sub>), 1.78 (qui, *J* = 7.8 Hz, C13-H<sub>2</sub>). <sup>13</sup>C NMR (100.58 MHz, DMF-*d*<sub>7</sub>, ppm): δ = 178.6 (C8, C9), 149.0 (C7a), 147.4 (C6-H), 139.2 (C4), 129.9 (C2-H), 122.9 (C3a), 118.2 (C5-H), 101.3 (C3-H), 57.1 (C10), 31.9 (C11-H<sub>2</sub>, C12-H<sub>2</sub>), 16.0 (C13-H<sub>2</sub>). Elemental analysis calculated (%) for C<sub>20</sub>H<sub>16</sub>N<sub>4</sub>Cl<sub>2</sub>O<sub>4</sub>Pt: C 37.40, H 2.51, N 8.72. Found: C 37.03, H 2.16, N 8.75. FTIR (ν<sub>ATR</sub>/cm<sup>-1</sup>): 439w, 476m, 510w, 547w, 607m, 661w, 722s, 780m, 860s, 881w, 922w, 952m, 984w, 1071m, 1112m, 1169m, 1196s, 1227w, 1259s, 1326vs, 1340vs, 1371s, 1434m, 1468m, 1486m, 1505w, 1585vs, 1638vs, 2959s, 2989s,

3094s. ESI+ MS (methanol,  $m/z$ ): 664.0 (calc. 664.0; 70%) [ $\text{Pt}(\text{cbdc})(4\text{Claza})_2+\text{Na}$ ] $^+$ , 642.0 (calc. 642.0; 35%) [ $\text{Pt}(\text{cbdc})(4\text{Claza})_2+\text{H}$ ] $^+$ ; 153.1 (calc. 153.0; 5%) [ $(4\text{Claza})+\text{H}$ ] $^+$ . ESI- MS (methanol,  $m/z$ ): 640.2 (calc. 640.0; 100%) [ $\text{Pt}(\text{cbdc})(4\text{Claza})-\text{H}$ ] $^-$ ; 488.2 (calc. 488.0; 25%) [ $\text{Pt}(\text{cbdc})(4\text{Claza})-\text{H}$ ] $^-$ .

[ $\text{Pt}(\text{cbdc})(4\text{Braza})_2$ ] (**5**): Light grey powder; yield 41%.  $^1\text{H}$  NMR (400.00 MHz, DMF- $d_7$ , ppm):  $\delta$  = 13.18 (br s, N1-H), 8.86 (d,  $J$  = 6.2 Hz, C6-H), 7.97 (s, C2-H), 7.54 (d,  $J$  = 6.2 Hz, C5-H), 6.67 (s, C3-H), 2.95 (t,  $J$  = 7.9 Hz, C11-H $_2$ , C12-H $_2$ ), 1.78 (qui,  $J$  = 7.9 Hz, C13-H $_2$ ).  $^{13}\text{C}$  NMR (100.58 MHz, DMF- $d_7$ , ppm):  $\delta$  = 178.6 (C8, C9), 148.2 (C7a), 147.2 (C6-H), 130.0 (C2-H), 128.8 (C3a), 125.3 (C4), 121.4 (C5-H), 102.9 (C3-H), 57.2 (C10), 32.0 (C11-H $_2$ , C12-H $_2$ ), 16.1 (C13-H $_2$ ). Elemental analysis calculated (%) for  $\text{C}_{20}\text{H}_{16}\text{N}_4\text{Br}_2\text{O}_4\text{Pt}$ : C 32.85, H 2.21, N 7.66. Found: C 31.99, H 2.02, N 7.30. FTIR ( $\nu_{\text{ATR}}/\text{cm}^{-1}$ ): 476w, 503w, 538w, 559w, 602w, 646w, 723s, 781m, 806m, 854s, 919w, 975w, 1050w, 1072w, 1113m, 1188s, 1219w, 1259m, 1323vs, 1340vs, 1373s, 1431w, 1482m, 1505w, 1584vs, 1640vs, 2959m, 2984m, 3092m, 3136m. ESI+ MS (methanol,  $m/z$ ): 753.9 (calc. 753.9; 70%) [ $\text{Pt}(\text{cbdc})(4\text{Braza})_2+\text{Na}$ ] $^+$ , 731.9 (calc. 731.9; 40%) [ $\text{Pt}(\text{cbdc})(4\text{Braza})_2+\text{H}$ ] $^+$ ; 197.0 (calc. 197.0; 10%) [ $(4\text{Braza})+\text{H}$ ] $^+$ . ESI- MS (methanol,  $m/z$ ): 765.8 (calc. 765.9; 10%) [ $\text{Pt}(\text{cbdc})(4\text{Braza})_2+\text{Cl}$ ] $^-$ ; 730.1 (calc. 729.9; 100%) [ $\text{Pt}(\text{cbdc})(4\text{Braza})_2-\text{H}$ ] $^-$ ; 532.2 (calc. 532.0; 20%) [ $\text{Pt}(\text{cbdc})(4\text{Braza})-\text{H}$ ] $^-$ .

[ $\text{Pt}(\text{cbdc})(5\text{Braza})_2$ ] (**6**): Dark grey powder; yield 48%.  $^1\text{H}$  NMR (400.00 MHz, DMF- $d_7$ , ppm):  $\delta$  = 13.17 (br s, N1-H), 9.39 (s, C6-H), 8.43 (s, C4-H), 7.92 (s, C2-H), 6.69 (s, C3-H), 2.95 (t,  $J$  = 7.1 Hz, C11-H $_2$ , C12-H $_2$ ), 1.78 (qui,  $J$  = 7.1 Hz, C13-H $_2$ ).  $^{13}\text{C}$  NMR (100.58 MHz, DMF- $d_7$ , ppm):  $\delta$  = 178.6 (C8, C9), 148.1 (C7a), 146.7 (C6-H), 135.1 (C4-H), 130.6 (C2-H), 125.4 (C3a), 111.0 (C5), 102.9 (C3-H), 57.1 (C10), 32.0 (C11-H $_2$ , C12-H $_2$ ), 16.0 (C13-H $_2$ ). Elemental analysis calculated (%) for  $\text{C}_{20}\text{H}_{16}\text{N}_4\text{Br}_2\text{O}_4\text{Pt}$ : C 32.85, H 2.21, N 7.66. Found: C 32.98, H 2.12, N 7.38. FTIR ( $\nu_{\text{ATR}}/\text{cm}^{-1}$ ): 470w, 495w, 515w, 549w, 601w, 704m, 728m, 780m, 884m, 908m,

947m, 1026w, 1067m, 1105m, 1167m, 1201m, 1269s, 1295s, 1341vs, 1473vs, 1504w, 1586vs, 1625vs, 2928vs, 2950vs, 3094s. ESI+ MS (methanol,  $m/z$ ): 753.9 (calc. 753.9; 15%)  $[\{\text{Pt}(\text{cbdc})(5\text{Braza})_2\}+\text{Na}]^+$ , 732.0 (calc. 731.9; 10%)  $[\{\text{Pt}(\text{cbdc})(5\text{Braza})_2\}+\text{H}]^+$ ; 197.0 (calc. 197.0; 5%)  $[(5\text{Braza})+\text{H}]^+$ . ESI- MS (methanol,  $m/z$ ): 765.9 (calc. 765.9; 10%)  $[\{\text{Pt}(\text{cbdc})(5\text{Braza})_2\}+\text{Cl}]^-$ ; 730.0 (calc. 729.9; 100%)  $[\{\text{Pt}(\text{cbdc})(5\text{Braza})_2\}-\text{H}]^-$ ; 532.1 (calc. 532.0; 25%)  $[\{\text{Pt}(\text{cbdc})(5\text{Braza})\}-\text{H}]^-$ .
